# Supplementary material for: Biochar supported sulfide-modified nanoscale zero-valent iron for the reduction of nitrobenzene
Source: Royal Society of Chemistry journal article supplement (doi:10.1039/c8ra04314k), 2018-01-01
Supplement: c8ra04314k1.pdf [file c8ra04314k1.pdf]

## Supporting Information

For

### **Biochar supported sulfide-modified nanoscale zero-valent iron for the reduction of nitrobenzene**

Dejin Zhang <sup>a</sup>, Yang Li <sup>a</sup>, Siqi Tong <sup>a</sup>, Xinbai Jiang <sup>a\*</sup>, Lianjun Wang <sup>a</sup>, Xiuyun Sun <sup>a</sup>,  
Jiansheng Li <sup>a</sup>, Xiaodong Liu <sup>a</sup>, Jinyou Shen <sup>a\*\*</sup>

<sup>a</sup> Jiangsu Key Laboratory of Chemical Pollution Control and Resources Reuse, School  
of Environmental and Biological Engineering, Nanjing University of Science and  
Technology, Nanjing 210094, Jiangsu Province, China

Corresponding author: \*Xinbai Jiang, Tel./Fax: +86 25 84315941, E-mail address:  
xinbai\_jiang@njust.edu.cn; \*\*Jinyou Shen, Tel./Fax: +86 25 84303965, E-mail  
address: shenjinyou@mail.njust.edu.cn

**Table S1** Fitting of pseudo first-order and second-order kinetics models for NB removal by S-nZVI@BC.

| Initial concentration of NB (mg L <sup>-1</sup> ) |                            | 100    | 300    | 500    | 600    | 700    |
|---------------------------------------------------|----------------------------|--------|--------|--------|--------|--------|
| $q_e$ (mg g <sup>-1</sup> )                       |                            | 252.85 | 484.40 | 511.05 | 535.35 | 547.30 |
| Pseudo first-order                                | $k_1$ (min <sup>-1</sup> ) | 0.0076 | 0.0092 | 0.0122 | 0.0189 | 0.0333 |
| reaction kinetics                                 | R <sup>2</sup>             | 0.7816 | 0.8763 | 0.8118 | 0.8505 | 0.8497 |
| Pseudo second-order                               | $k_2$ (g/mg/min)           | 0.0001 | 0.0001 | 0.0003 | 0.0013 | 0.0258 |
| reaction kinetics                                 | R <sup>2</sup>             | 0.9767 | 0.9563 | 0.9533 | 0.9601 | 0.9542 |

**Table S2** Fitting of Langmuir, Freundlich and Redlich-Peterson models for NB removal by S-nZVI@BC.

| Model            | $R^2$  | Parameter                                                 |
|------------------|--------|-----------------------------------------------------------|
| Langmuir         | 0.9985 | $q_m = 588.23 \text{ mg/g}$<br>$K_L = 0.02 \text{ mg/L}$  |
| Freundlich       | 0.9279 | $K_F = 6.72 \text{ (mg/g)/(mg/L)}$<br>$n = 3.23$          |
| Redlich-Peterson | 0.8797 | $K_{RP} = 3.82$<br>$\alpha_{RP} = 0.07$<br>$\beta = 0.15$ |

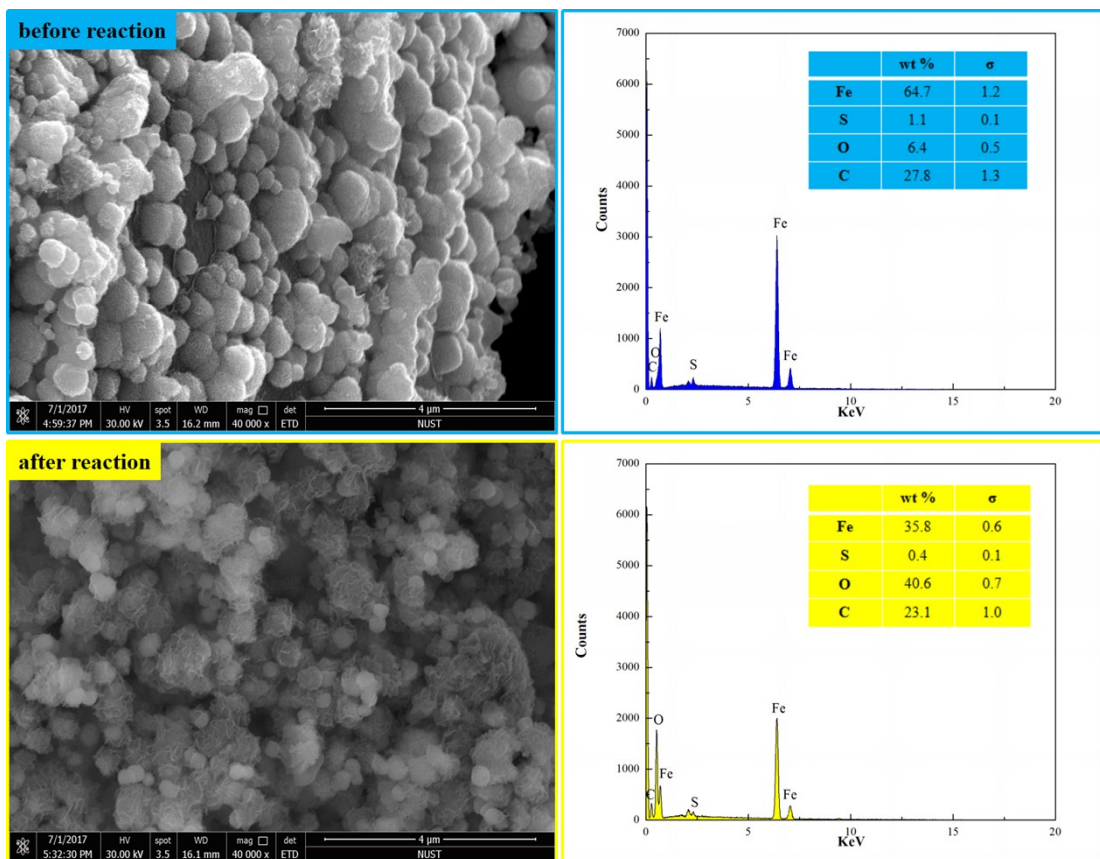

Fig. S1 SEM images and EDS spectrum of S-nZVI@BC before and after reaction.

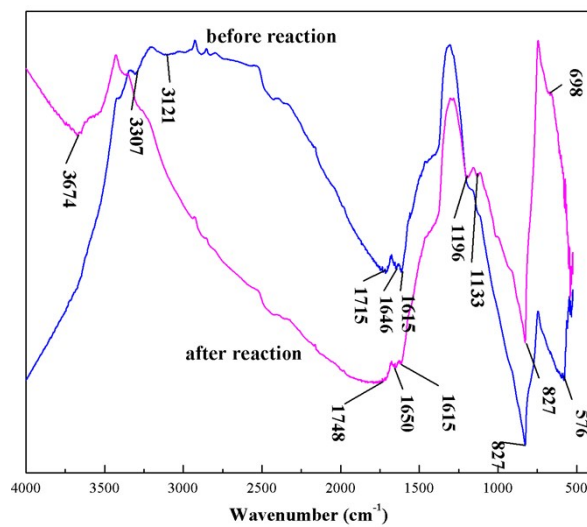

Fig. S2 FTIR spectra of S-nZVI@BC before and after reaction with NB.

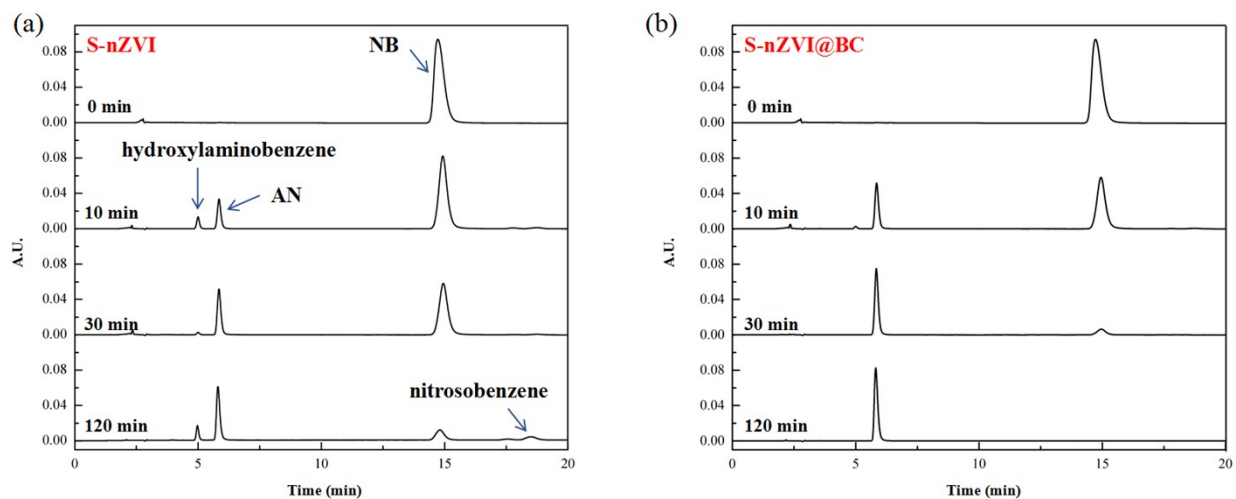

Fig. S3 HPLC profiles for NB reduction by S-nZVI (a) and S-nZVI@BC (b).

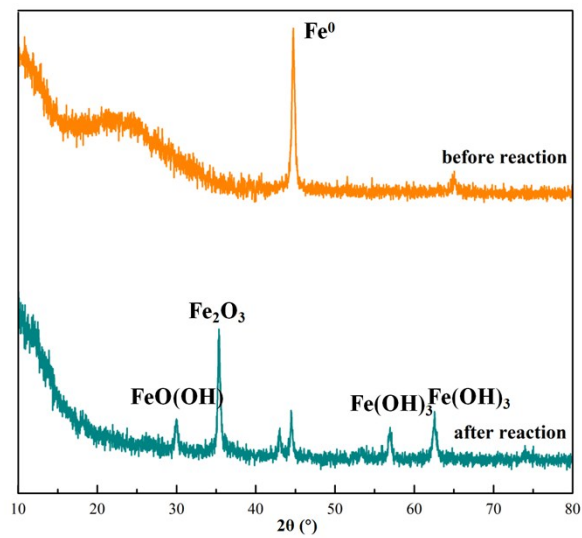

Fig. S4 XRD patterns of S-nZVI@BC before and after reaction with NB.

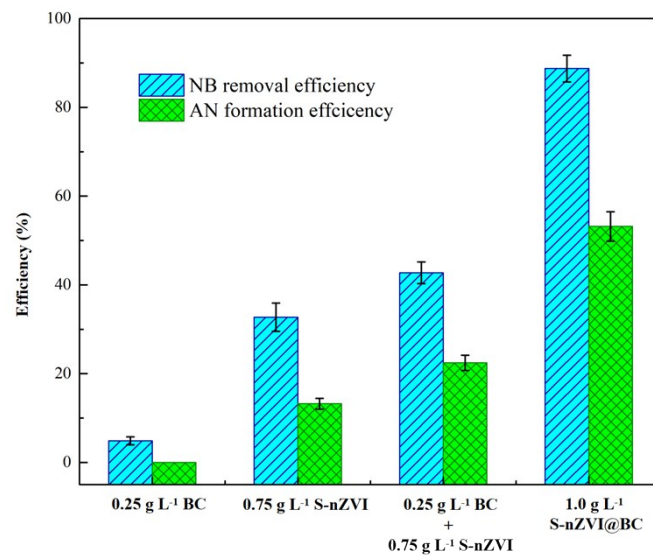

Fig. S5 NB removal by BC, S-nZVI, S-nZVI+BC and S-nZVI@BC at initial NB concentration of 200 mg L<sup>-1</sup>.



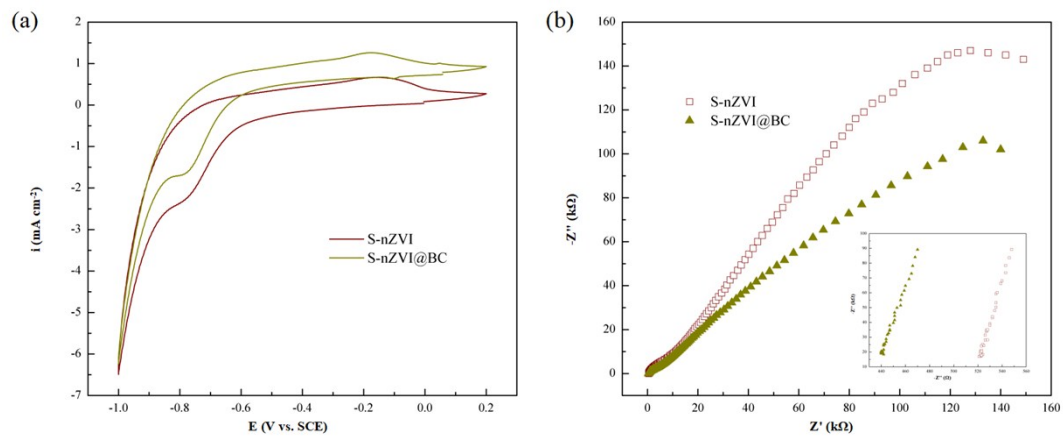

Fig. S6 The CV cycle profiles (a) and typical Nyquist plots (b) of the GCEs modified with S-nZVI and S-nZVI@BC. The inset in (b) showed details on results at low frequency.
